# Supplementary material for: Ultrastructural modeling of small angle scattering from photosynthetic membranes
Source: PubMed Central journal article supplement (PMC6920412; doi:10.1038/s41598-019-55423-0), 2019-12-18
Supplement: 41598_2019_55423_MOESM1_ESM.pdf [file 41598_2019_55423_MOESM1_ESM.pdf]

# Ultrastructural modeling of small angle scattering from photosynthetic membranes

Dainius Jakubauskas<sup>1,2</sup>, Łucja Kowalewska<sup>3</sup>, Anna V. Sokolova<sup>4</sup>, Christopher J. Garvey<sup>4</sup>, Kell Mortensen<sup>1</sup>, Poul Erik Jensen<sup>2</sup>, and Jacob J. K. Kirkensgaard<sup>1,5\*</sup>

<sup>1</sup>Niels Bohr Institute, University of Copenhagen, DK-2100, Copenhagen, Denmark

<sup>2</sup>Copenhagen Plant Science Centre, Department of Plant and Environmental Sciences, University of Copenhagen, DK-1871, Copenhagen, Denmark

<sup>3</sup>Department of Plant Anatomy and Cytology, Institute of Experimental Plant Biology and Biotechnology, Faculty of Biology, University of Warsaw, Warsaw, Poland

<sup>4</sup>Australian Nuclear Science and Technology Organisation, NSW 2234, Sydney, Australia

<sup>5</sup>Department of Food Science, University of Copenhagen, DK-1871, Copenhagen, Denmark

\*jjkk@food.ku.dk

## ABSTRACT

## Supplementary Information

**Supplementary Table 1.** Cyanobacterial repeat distances (D), measured from TEM micrographs. CL are 0.95 confidence limits of average repeat distances of the individual replicate.

| Strain | Replica | Number of thylakoid stacks | Average D, Å | Median D, Å | Standard deviation | Lower CL | Upper CL |
|--------|---------|----------------------------|--------------|-------------|--------------------|----------|----------|
| 6803   | 1       | 114                        | 574.1        | 568.1       | 10.91              | 552.7    | 595.5    |
|        | 2       | 198                        | 632.5        | 615.0       | 8.28               | 616.3    | 648.8    |
|        | 3       | 189                        | 556.9        | 554.2       | 8.48               | 540.3    | 573.6    |
| 7942   | 1       | 114                        | 612.8        | 605.5       | 10.91              | 591.4    | 634.2    |
|        | 2       | 207                        | 565.7        | 532.6       | 8.10               | 549.8    | 581.6    |
|        | 3       | 204                        | 572.7        | 582.1       | 8.16               | 556.6    | 588.7    |
| 7002   | 1       | 242                        | 615.8        | 572.6       | 7.49               | 601.1    | 630.5    |
|        | 2       | 205                        | 622          | 601.1       | 8.14               | 606.0    | 638.0    |
|        | 3       | 204                        | 556.7        | 534.6       | 8.16               | 540.7    | 572.7    |

**Supplementary Table 2.** Absolute SLD values of cyanobacterial components. Values for aqueous compartments (lumen and inter-thylakoid space) are calculated, estimating 60-85 % (v/v) phycobilisome content in the inter-thylakoid space.

|              | Neutron SLD,<br>$10^{-6} \text{ \AA}^{-2}$ | X-ray SLD,<br>$10^{-6} \text{ \AA}^{-2}$ |
|--------------|--------------------------------------------|------------------------------------------|
| $SLD_H$      | 1.83                                       | 13.4 (calculated)<br>11.9 (from fits)    |
| $SLD_T$      | 1.33                                       | 11.2                                     |
| $SLD_{TM}$   | 1.58                                       | 12.3                                     |
| $SLD_L$      | 5.40-4.30                                  | 11.16-11.74                              |
| $SLD_{IT}$   | 4.43-3.61                                  | 11.16-11.86                              |
| $SLD_{D_2O}$ | 6.4                                        | 9.47                                     |

**Supplementary Table 3.** Absolute SLD values of inter-thylakoid space and lumen.

| Protein/Water<br>vol. fraction, %/% | D <sub>2</sub> O/H <sub>2</sub> O,<br>%/% | Labile H-D<br>exchange, % | Neutron SLD,<br>10 <sup>-6</sup> Å <sup>-2</sup> | X-ray SLD,<br>10 <sup>-6</sup> Å <sup>-2</sup> |
|-------------------------------------|-------------------------------------------|---------------------------|--------------------------------------------------|------------------------------------------------|
| <i>SLD<sub>IT</sub></i>             |                                           |                           |                                                  |                                                |
| 60/40                               | 100/0                                     | 0                         | 3.69                                             | 11.16                                          |
| 60/40                               | 100/0                                     | 90                        | 4.432                                            | 11.16                                          |
| 70/30                               | 100/0                                     | 0                         | 3.23                                             | 11.44                                          |
| 80/20                               | 100/0                                     | 0                         | 2.78                                             | 11.72                                          |
| 85/15                               | 100/0                                     | 0                         | 2.55                                             | 11.86                                          |
| 85/15                               | 90/10                                     | 0                         | 2.45                                             | 11.86                                          |
| 85/15                               | 90/10                                     | 90                        | 3.40                                             | 11.86                                          |
| 85/15                               | 100/0                                     | 90                        | 3.612                                            | 11.86                                          |
| <i>SLD<sub>L</sub></i>              |                                           |                           |                                                  |                                                |
| 60/40                               | 100/0                                     | 0                         | 4.40                                             | 11.16                                          |
| 60/40                               | 100/0                                     | 90                        | 5.40                                             | 11.16                                          |
| 70/30                               | 100/0                                     | 0                         | 4.96                                             | 11.40                                          |
| 80/20                               | 100/0                                     | 0                         | 3.19                                             | 11.63                                          |
| 85/15                               | 100/0                                     | 0                         | 2.89                                             | 11.75                                          |
| 85/15                               | 90/10                                     | 0                         | 2.75                                             | 11.75                                          |
| 85/15                               | 90/10                                     | 90                        | 4.02                                             | 11.75                                          |
| 85/15                               | 100/0                                     | 90                        | 4.30                                             | 11.75                                          |

Supplementary Table 4. Individual fitting parameters for SANS profiles of cyanobacteria, three experimental replicates.

|                       | 6803          |               |               | 7942         |               |               | 7002          |                |                |
|-----------------------|---------------|---------------|---------------|--------------|---------------|---------------|---------------|----------------|----------------|
|                       | 1             | 2             | 3             | 1            | 2             | 3             | 1             | 2              | 3              |
| $\Delta\rho_T$ , a.u. | -1            | -1            | -1            | -1           | -1            | -1            | -1            | -1             | -1             |
| $\Delta\rho_L$ , a.u. | 0.47±0.046    | 0.33±0.044    | 0.20±0.025    | 0.5±0.038    | 0.29±0.04     | 0.27±0.019    | 0.31±0.023    | 0.48±0.055     | 0.39±0.019     |
| $d_T$ , Å             | 13.83±0.60    | 17.84±0.91    | 19.02±0.43    | 20.17±0.5    | 17.14±0.93    | 18.08±0.34    | 19.85±0.50    | 23.26±1.17     | 19.60±0.44     |
| $d_L$ , Å             | 53.04±3.18    | 72.42±4.17    | 60.96±1.50    | 47.57±1.83   | 80.53±5.54    | 64.42±1.41    | 87.00±1.96    | 80±3.73        | 87±1.71        |
| RD, Å                 | 780.3±33.9    | 643.2±15.39   | 610.11±5.09   | 704.50±11.35 | 699.1±22.0    | 675.85±5.17   | 586.01±4.77   | 588.24±9.68    | 618.52±6.37    |
| $N$                   | 6±1.12        | 3±0.92        | 3±0.36        | 6±3.97       | 3.0±0.99      | 4.06±0.55     | 5.97±3.9      | 2±0.583        | 2.282±0.36     |
| $\eta_{CP}$           | 0.029         | 0.02          | 0.02          | 0.0266       | 0.029         | 0.0292        | 0.02          | 0.018          | 0.0309         |
| Background (B)        | 0.55±0.01     | 0.0044±0.0042 | 0±0.006       | 0.22±0.0072  | 0.005±0.004   | 0±0.0067      | 0.069         | 0.0015         | 0              |
| Scale                 | 6.6e-8±6.3e-9 | 1.4e-8±1.7e-9 | 1.9e-7±8.5e-9 | 6e-8±3.1e-9  | 9.7e-9±1.4e-9 | 2.4e-7±8.9e-9 | 5.8e-8±2.9e-9 | 1.8e-8±1.5e-9  | 1.6e-7±6.5e-9  |
| $\sigma_L$ , Å        | 17.61±4.11    | 7.30±13.88    | 8.56±3.20     | 20.83±2.02   | 13.28±12.64   | 13.92±2.03    | 16.65±2.80    | 15.23±6.03     | 19.30±1.98     |
| $n$ power law         | 2.55±0.018    | 2.543±0.00837 | 2.35±0.006    | 1.93±0.01    | 2.22±0.016    | 2.19±0.007    | 2.09±0.0081   | 2.534±0.0068   | 2.25±0.0069    |
| Scale power law (C)   | 2.1e-5±1.6e-6 | 2.5e-5±9.8e-7 | 7.5e-4        | 4e-4±2.9e-6  | 4e-5±2.9e-6   | 9e-4±2.4e-5   | 4e-4±1.31e-5  | 5.6e-6±1.68e-6 | 5.1e-4±1.45e-5 |
| $\chi^2$              | 5.25          | 7.51          | 64.45         | 80.9         | 1.95          | 69.25         | 36.25         | 11.31          | 24.34          |



**Supplementary Table 5.** Individual fitting parameters for SAXS profiles of cyanobacteria, one experimental replicate.

|                                     | 6803            | 7942               | 7002             |
|-------------------------------------|-----------------|--------------------|------------------|
|                                     |                 | Fit parameters     |                  |
| $\Delta\rho_H$ , a. u.              | 1.32±0.044      | 1.07±0.07          | 1.20±0.08        |
| $\Delta\rho_T$ , a. u.              | -1              | -1                 | -1               |
| $\Delta\rho_L$ , a. u.              | -0.02±0.0144    | -0.47±0.0144       | -0.035±0.0312    |
| $d_H$ , Å                           | 6.0±0.2         | 4.65±0.25          | 6.95±0.45        |
| $d_T$ , Å                           | 15.8±0.22       | 19.2±0.34          | 12.3±0.44        |
| $d_L$ , Å                           | 62.5±2.75       | 63.7±2.71          | 63.8±12.63       |
| RD, Å                               | 815.8±4.63      | 462.8±2.61         | 748.1±30.8       |
| $N$                                 | 2±0.23          | 3±0.28             | 2±1.03           |
| $\sigma_L$ , Å                      | 18.0±2.5        | 15.0±3.28          | 19.5±9.53        |
| $\eta_{cp}$                         | 0.01            | 0.036              | 0.02             |
| Background (B)                      | 0.03±0.002      | 0.024±0.0043       | 0.020±0.0019     |
| Scale (y)                           | 1.6e-7±6.9e-9   | 1.42e-7±3.73e-9    | 7.57e-8±9.89e-9  |
| $n$ power law                       | 2.37±0.0023     | 2.91±0.004         | 2.14±0.0037      |
| Scale power law (C)                 | 0.00058±5.32e-6 | 9.0e-5±1.45e-6     | 0.000573±8.32e-6 |
| $\chi^2$                            | 51.91           | 54.12              | 10.84            |
|                                     |                 | Deduced parameters |                  |
| $d_{IT}$ , Å                        | 709.7           | 351.4              | 645.8            |
| $d_{TM}$ , Å                        | 43.6            | 47.7               | 38.5             |
| $SLD_L$ , $10^{-6}$ Å <sup>-2</sup> | 11.85           | 11.55              | 11.84            |
| $SLD_H$ , $10^{-6}$ Å <sup>-2</sup> | 12.73           | 12.57              | 12.65            |

**Supplementary Table 6.** Lumen composition, expressed as 'relative plastocyanin' content in % (i.e.  $\phi_{plastocyanin} + \phi_{water} = 100\%$ ; detailed in Equation 12) with different inter-thylakoid space composition scenarios. All feasible lumen compositions depicted in orange, the best composition is in green, second-best is in brown. Disallowed lumen compositions are depicted in red. The best lumen composition is chosen, when  $\phi_{plastocyanin}$  values, calculated separately from neutron and X-ray scattering measurements, agree.

| IT space composition  | Lumen composition                                                                 |       |       |       |       |       |       |       |       |       |       |       |       |       |       |       |       |
|-----------------------|-----------------------------------------------------------------------------------|-------|-------|-------|-------|-------|-------|-------|-------|-------|-------|-------|-------|-------|-------|-------|-------|
|                       |                                                                                   | 60/40 | 70/30 | 80/20 | 85/15 | 85/15 | 85/15 | 90/10 | 90/10 | 100/0 | 100/0 |       |       |       |       |       |       |
| From X-ray scattering | 70%/30% D <sub>2</sub> O/H <sub>2</sub> O + 70% labile H-D exchanged plastocyanin | -4.8  | 27.0  | 58.8  | 74.7  | 74.7  | 81.2  | 90.8  | 82.1  | 90.6  | 60.5  | 68.8  | 77.0  | 81.2  | 81.2  | 81.2  | 85.3  |
|                       | 80%/20% D <sub>2</sub> O/H <sub>2</sub> O + 80% labile H-D exchanged plastocyanin | 23.8  | 49.2  | 74.7  | 87.4  | 87.4  | 100.3 | 57.2  | 93.3  | 100.1 | 33.5  | 49.0  | 64.6  | 72.4  | 80.2  | 76.0  | 80.1  |
|                       | 90%/10% D <sub>2</sub> O/H <sub>2</sub> O + 0% labile H-D exchanged plastocyanin  | 33.5  | 49.0  | 64.6  | 72.4  | 80.2  | 81.2  | 81.2  | 81.2  | 81.2  | 36.5  | 53.5  | 70.5  | 79.0  | 87.6  | 82.9  | 87.5  |
|                       | 90%/10% D <sub>2</sub> O/H <sub>2</sub> O + 30% labile H-D exchanged plastocyanin | 36.5  | 53.5  | 70.5  | 79.0  | 87.6  | 81.2  | 81.2  | 81.2  | 81.2  | 38.9  | 57.0  | 75.1  | 84.2  | 93.3  | 88.3  | 93.2  |
|                       | 90%/10% D <sub>2</sub> O/H <sub>2</sub> O + 50% labile H-D exchanged plastocyanin | 38.9  | 57.0  | 75.1  | 84.2  | 93.3  | 81.2  | 81.2  | 81.2  | 81.2  | 44.7  | 65.5  | 86.4  | 96.8  | 107.3 | 101.6 | 107.2 |
|                       | 90%/10% D <sub>2</sub> O/H <sub>2</sub> O + 90% labile H-D exchanged plastocyanin | 44.7  | 65.5  | 86.4  | 96.8  | 107.3 | 81.2  | 81.2  | 81.2  | 81.2  | 43.5  | 56.7  | 69.9  | 76.5  | 83.2  | 79.6  | 83.2  |
|                       | 100% D <sub>2</sub> O + 0% labile H-D exchanged plastocyanin                      | 43.5  | 56.7  | 69.9  | 76.5  | 83.2  | 81.2  | 81.2  | 81.2  | 81.2  | 50.2  | 65.4  | 80.6  | 88.2  | 95.9  | 91.7  | 95.8  |
|                       | 100% D <sub>2</sub> O + 50% labile H-D exchanged plastocyanin                     | 50.2  | 65.4  | 80.6  | 88.2  | 95.9  | 81.2  | 81.2  | 81.2  | 81.2  | 57.1  | 74.4  | 91.8  | 100.4 | 109.2 | 104.4 | 109.1 |
|                       | 100% D <sub>2</sub> O + 90% labile H-D exchanged plastocyanin                     | 57.1  | 74.4  | 91.8  | 100.4 | 109.2 | 81.2  | 81.2  | 81.2  | 81.2  | 59.2  | 77.1  | 95.1  | 104.0 | 113.1 | 108.2 | 113.0 |
|                       | 100% D <sub>2</sub> O + 100% labile H-D exchanged plastocyanin                    | 59.2  | 77.1  | 95.1  | 104.0 | 113.1 | 81.2  | 81.2  | 81.2  | 81.2  | 0     | 0     | 0     | 0     | 0     | 0     | 0     |
|                       | Labile H-D exchange of phycobilisome, %                                           | 0     | 0     | 0     | 0     | 50    | 50    | 0     | 0     | 0     | 100/0 | 100/0 | 100/0 | 100/0 | 50/50 | 80/20 | 100/0 |
|                       | D <sub>2</sub> O/H <sub>2</sub> O inside IT space, % / %                          | 100/0 | 100/0 | 100/0 | 100/0 | 50/50 | 80/20 | 90/10 | 100/0 | 100/0 | 60/40 | 70/30 | 80/20 | 85/15 | 85/15 | 85/15 | 90/10 |
|                       | Phycobilisome/Water volume fraction inside IT space, % / %                        | 60/40 | 70/30 | 80/20 | 85/15 | 85/15 | 85/15 | 90/10 | 100/0 | 100/0 | 0     | 0     | 0     | 0     | 0     | 0     | 0     |

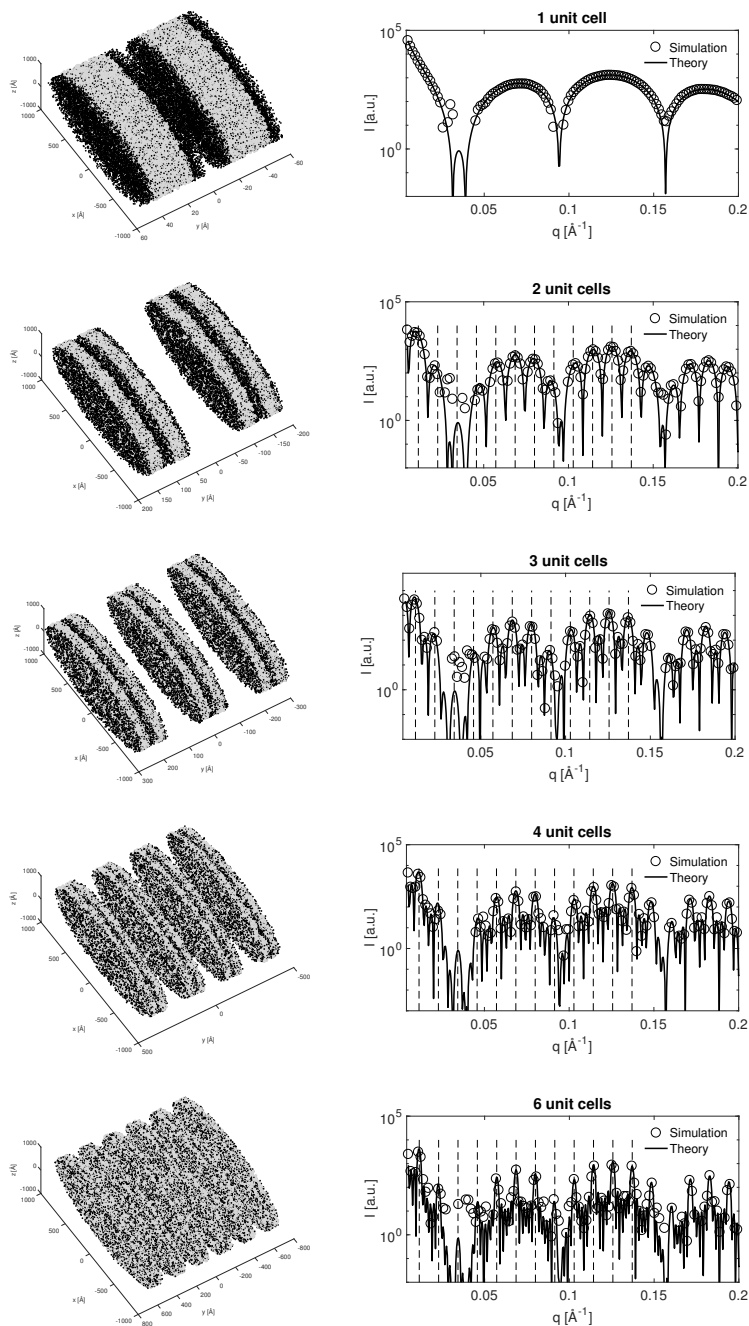

**Supplementary Figure 1.** In the left column: 3-D point representations of the simulated structures going from 1 to 6 unit cells. Gray points represents the interior bilayer tail region and black points the exterior head group points. Note that the cylinder ( $y$ ) axis is much smaller than the lateral axes for a unit cell. In the right column: comparing scattering simulations with the theoretical model described in the main text and above. In this example 1-6 unit cells are simulated with parameters:  $d_H = 10 \text{ \AA}$ ,  $d_T = 15 \text{ \AA}$ ,  $d_L = 50 \text{ \AA}$ ,  $\rho_H = 0.2$ ,  $\rho_T = -0.1$ ,  $\rho_L = 0$ ,  $RD = 550 \text{ \AA}$  and  $\eta_{cp} = 0$ .  $N$  takes values 1-6 as indicated. We have done extensive model calculations to understand the influence of individual model parameters to guide the fitting procedure (not shown). The dashed lines indicate the position of the Bragg peaks of order 1-12 for an infinite perfect stack.

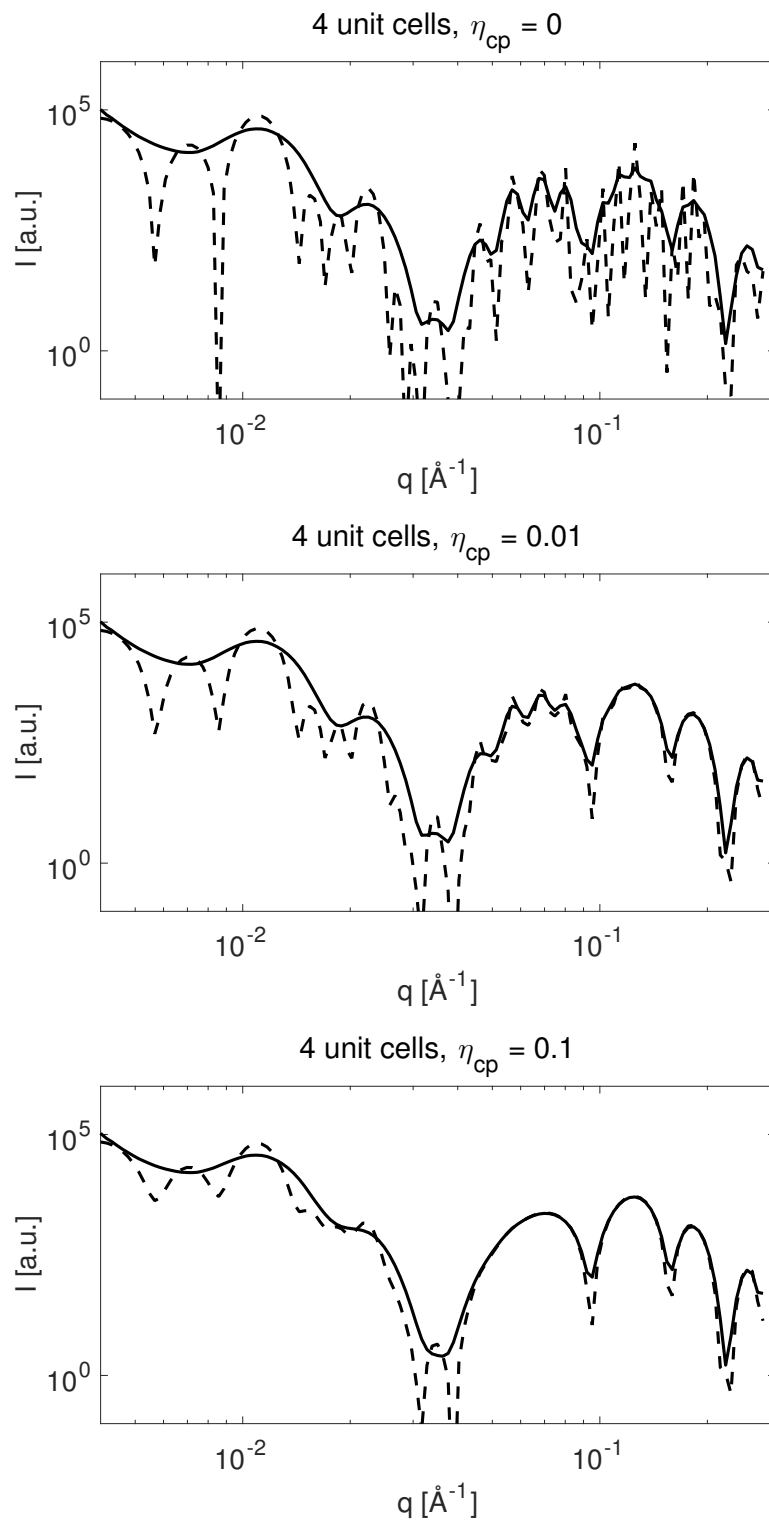

**Supplementary Figure 2.** Comparing model scattering patterns with (full lines) and without the Bilby instrument resolution smearing (dashed lines). (top) With  $\eta_{cp} = 0$ . Same as Fig. 5(a) in main paper. (middle) With  $\eta_{cp} = 0.01$ . (bottom) With  $\eta_{cp} = 0.1$ . Other parameters as simulations in **Supplementary Figure 1**.

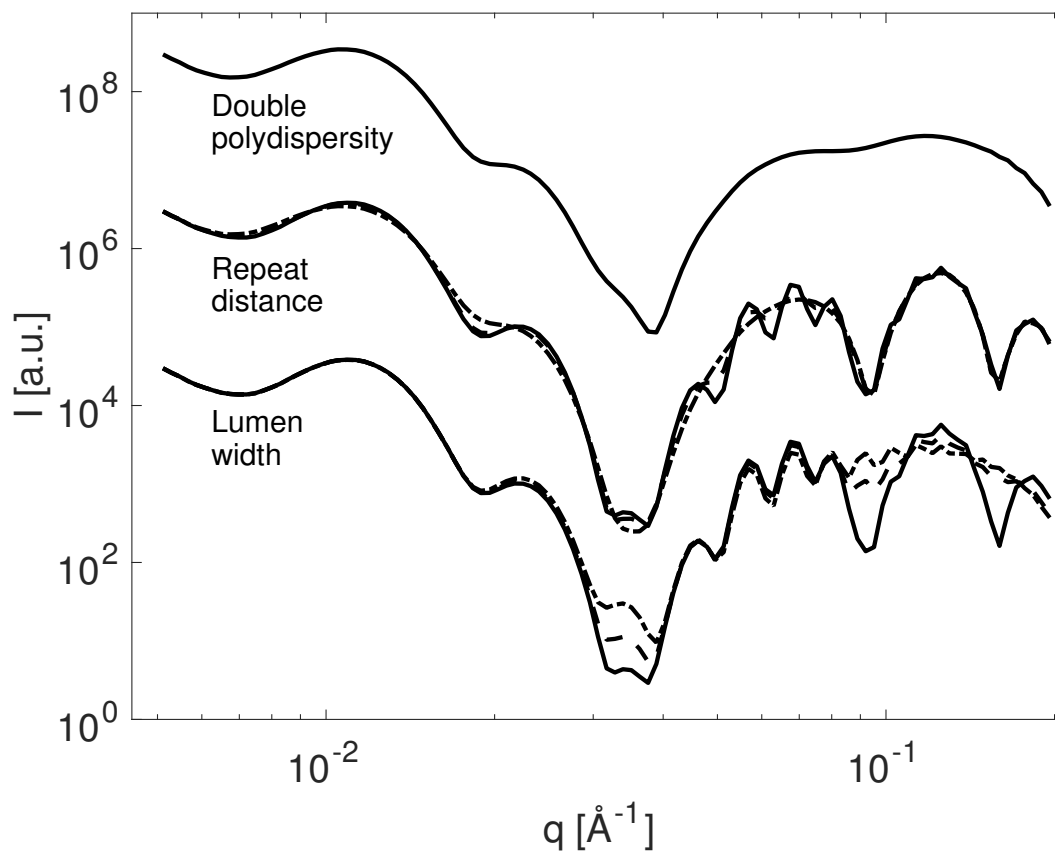

**Supplementary Figure 3.** Effects of large length scale fluctuations on the scattering patterns. The lower group of curves shows the effect of increasing the lumen width polydispersity  $\sigma_L$  from  $0 \rightarrow 10 \rightarrow 20 \text{ \AA}$ . The middle curves shows the effect of increasing the repeat distance polydispersity  $\sigma_D$  from  $0 \rightarrow 20 \rightarrow 50 \text{ \AA}$ . The top curve show the effect of double polydispersity with  $\sigma_L = 20$  and  $\sigma_D = 50$ . All curves have  $N = 4$ . Other parameters as simulations in **Supplementary Figure 1**.

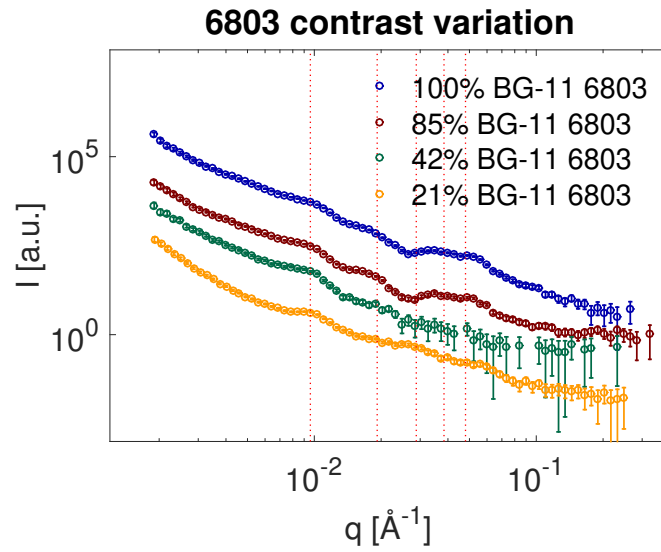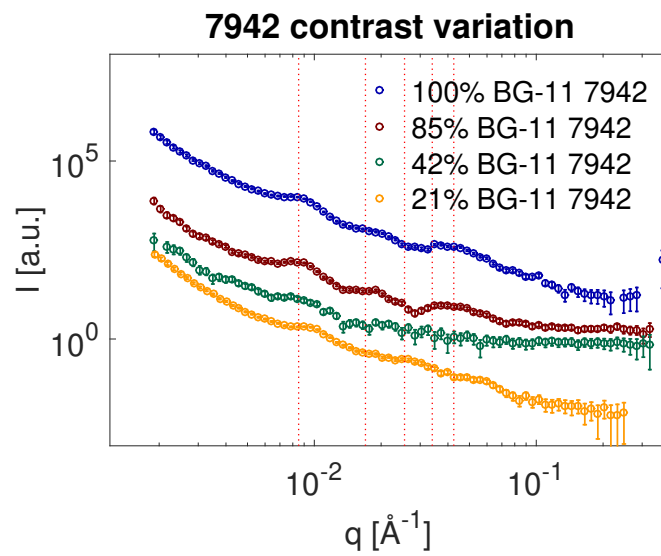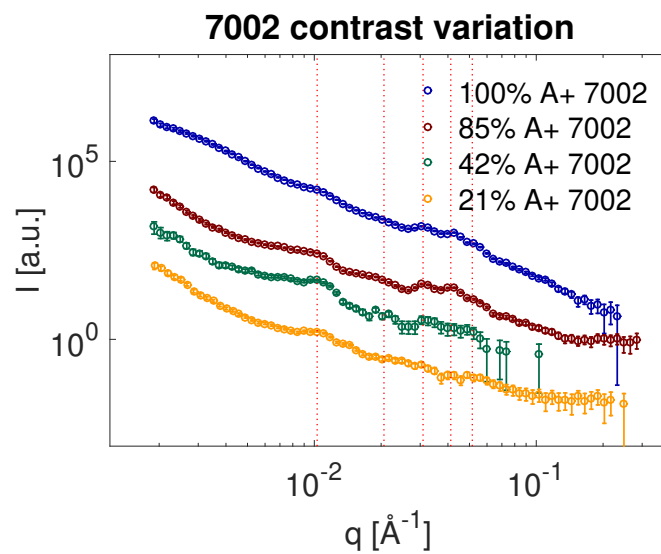

Supplementary Figure 4. Buffer-subtracted contrast variation measures of the investigated cyanobacterial species.

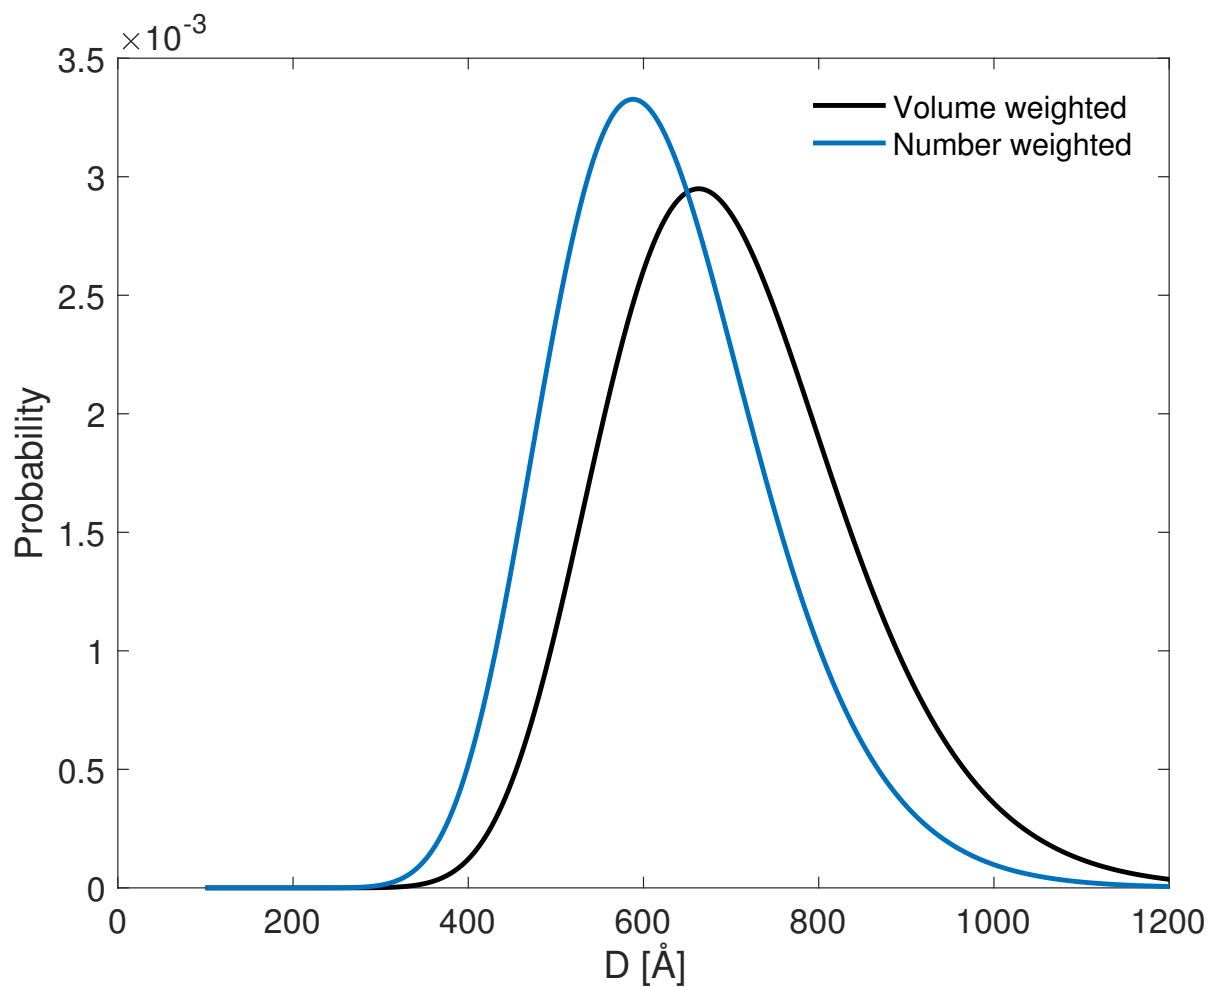

**Supplementary Figure 5.** Transforming a log-normal probability distribution from volume-averaged to number-averaged. A volume averaged log-normal distribution with mean 690 Å and  $\sigma = 0.2$  is transformed to a number averaged distribution with mean  $\sim 590$  Å.
